# Supplementary material for: Adherence to Seasonal Malaria Chemoprevention and Malaria Positivity among Under- Five Children in Ogbomoso, Oyo State, Nigeria
Source: Research Square preprint supplement (doi:10.21203/rs.3.rs-7786345/v1), 2025-11-28
Supplement: Supplementary file 2 [file ce86aa59d2a6c6ce182653ff.pdf]

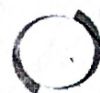

## Consent form

I ..... [Name] give my consent for information about myself/my child or ward/my relative (circle as appropriate) to be published in ..... BMC Infectious Diseases .....  
[Name of journal, manuscript number and corresponding author].

I understand that the information will be published without my/my child or ward's/my relative's (circle as appropriate) name attached, but that full anonymity cannot be guaranteed.

I understand that the text and any pictures or videos published in the article will be freely available on the internet and may be seen by the general public. The pictures, videos and text may also appear on other websites or in print, may be translated into other languages or used for commercial purposes.

I have been offered the opportunity to read the manuscript.

Signing this consent form does not remove my rights to privacy.

Name.....  
Date..... 15/Nov/2024  
Signed.....  
Author name..... Adesola Oyetokun  
Date..... 15/Nov/2024  
Signed.....

Please keep this consent form in the patient's case files. The manuscript reporting this patient's details should state that 'Written informed consent for publication of their clinical details and/or clinical images was obtained from the patient/parent/guardian/ relative of the patient. A copy of the consent form is available for review by the Editor of this journal.'
